# Supplementary material for: NMR characterization of solvent accessibility and transient structure in intrinsically disordered proteins
Source: PubMed Central journal article supplement (PMC6692294; doi:10.1007/s10858-019-00248-2), 2019-07-11
Supplement: 10858_2019_248_MOESM1_ESM.pdf [file 10858_2019_248_MOESM1_ESM.pdf]

# **NMR Characterization of Solvent Accessibility and Transient Structure in Intrinsically Disordered Proteins**

Christoph Hartmüller<sup>1,#</sup>, Emil Spreitzer<sup>2,#</sup>, Christoph Göbl<sup>3</sup>, Fabio Falsone<sup>4</sup>, Tobias Madl<sup>1,5,\*</sup>

## **Supporting Information**

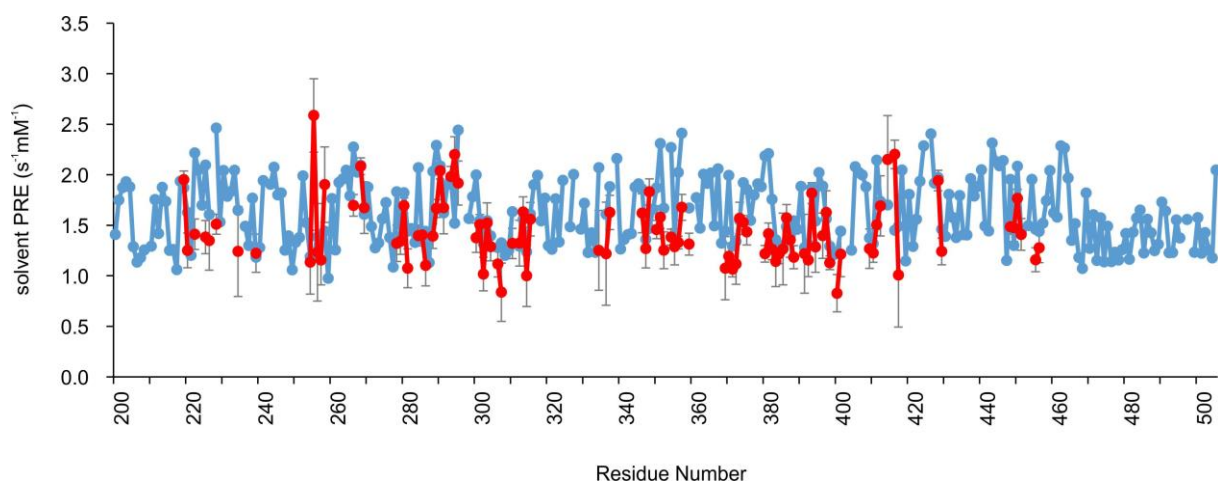

**Supporting Figure 1:** Experimentally-determined (red) and predicted (blue) solvent PRE values using CBCA(CO)NH as readout spectrum, of assigned H <sup>$\beta$</sup>  peaks of FOXO4<sup>TAD</sup>. Experimental sPRE values are calculated by fitting the data with a linear regression equation. Errors of the measured <sup>1</sup>H-R<sub>1</sub> rates were calculated using a Monte Carlo-type resampling strategy and are shown in the diagram as error bars.

**A**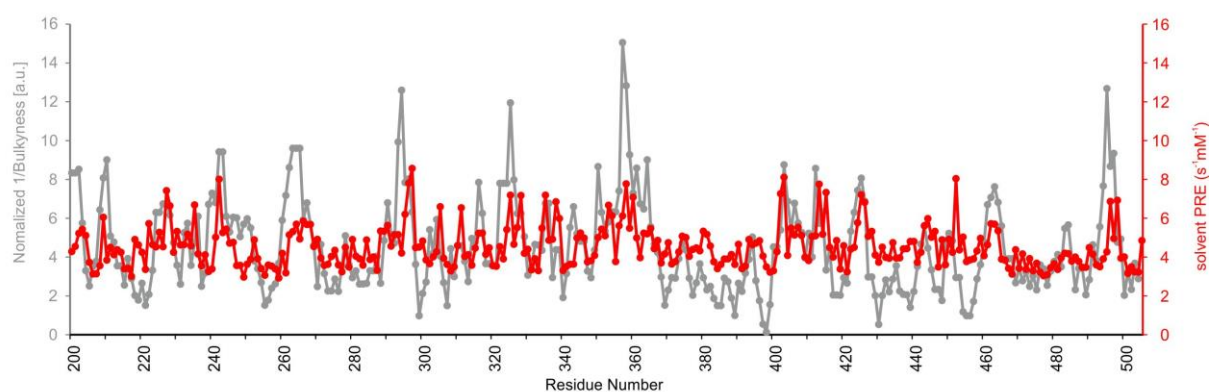**B**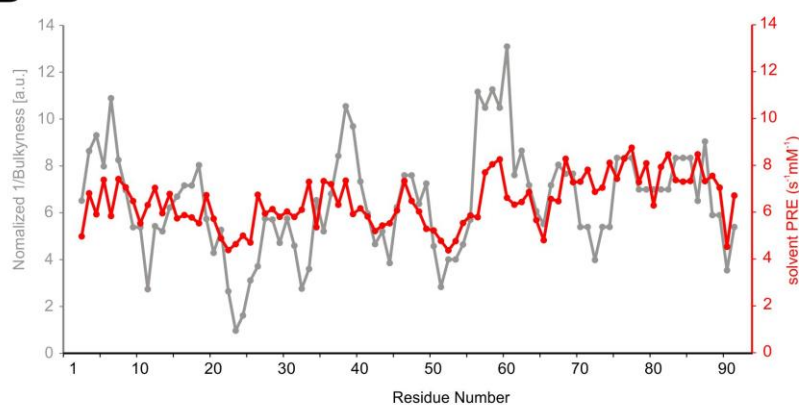**C**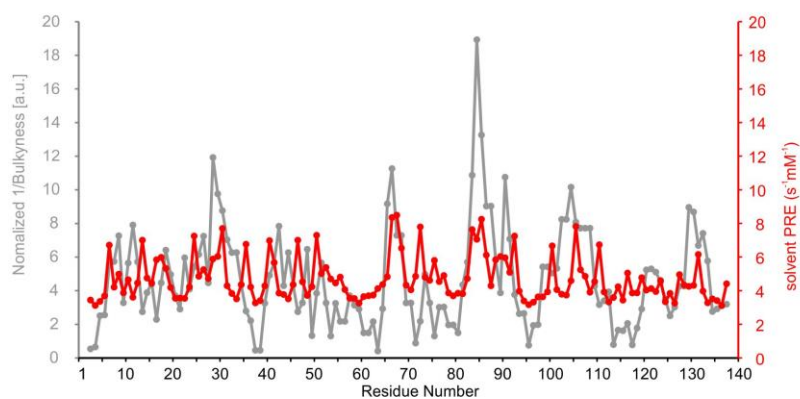

**Supporting Figure 2:** Comparison of experimental sPRE values of H $\alpha$  protons (red) and bulkyness (grey) of FOXO4 (A), p53<sup>TAD</sup> (B) and  $\alpha$ -synuclein (C). Bulkyness was calculated using the ProtScale web server (<https://web.expasy.org/protscale/>, 01.04.2019) using a window size of five residues and standard parameters. To compare bulkyness and sPRE the bulkyness was inverted, a linear fit calculated and the bulkyness shifted and scaled to the predicted sPRE data.

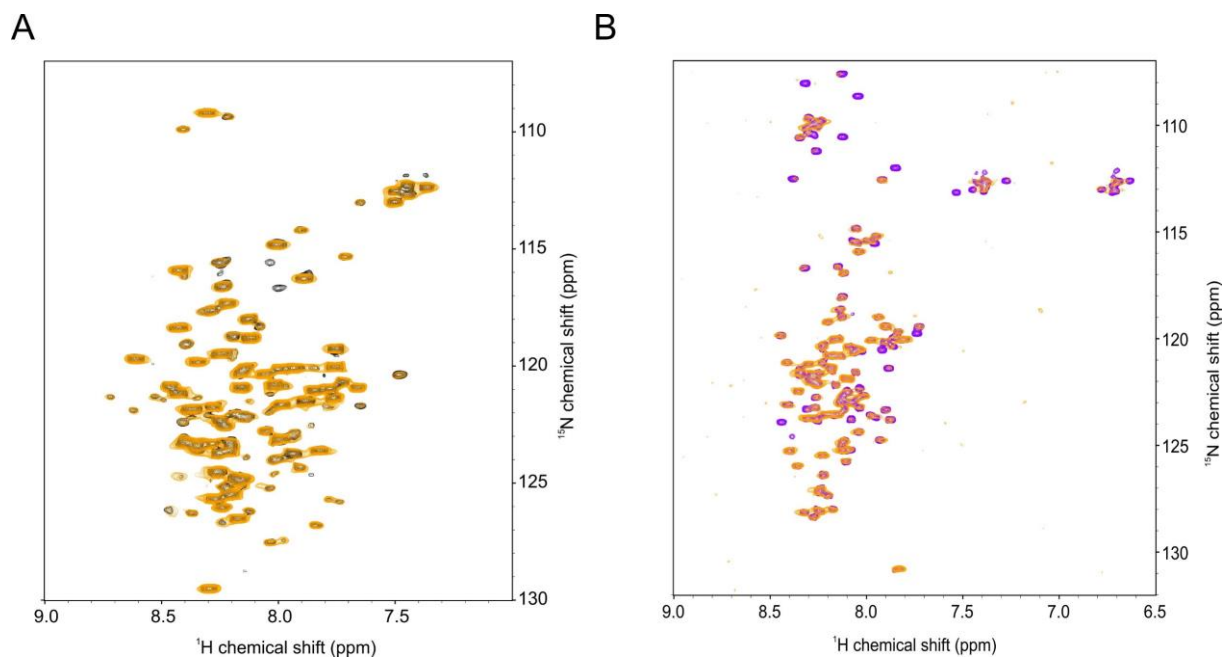

**Supporting Figure 3:** (A) Overlay of  $^1\text{H}$ ,  $^{15}\text{N}$  HSQC spectra, with full recovery time of a  $300\ \mu\text{M}$   $^{13}\text{C}$ ,  $^{15}\text{N}$  labeled p53<sup>TAD</sup> sample in the absence (black) and presence of 3.25 mM Gd(DTPA-BMA) (orange). (B) Overlay of  $^1\text{H}$ ,  $^{15}\text{N}$  HSQC spectra, with full recovery time of  $100\ \mu\text{M}$   $^{13}\text{C}$ ,  $^{15}\text{N}$  labeled  $\alpha$ -synuclein in absence (violet) and presence of 5 mM Gd(DTPA-BMA) (orange).

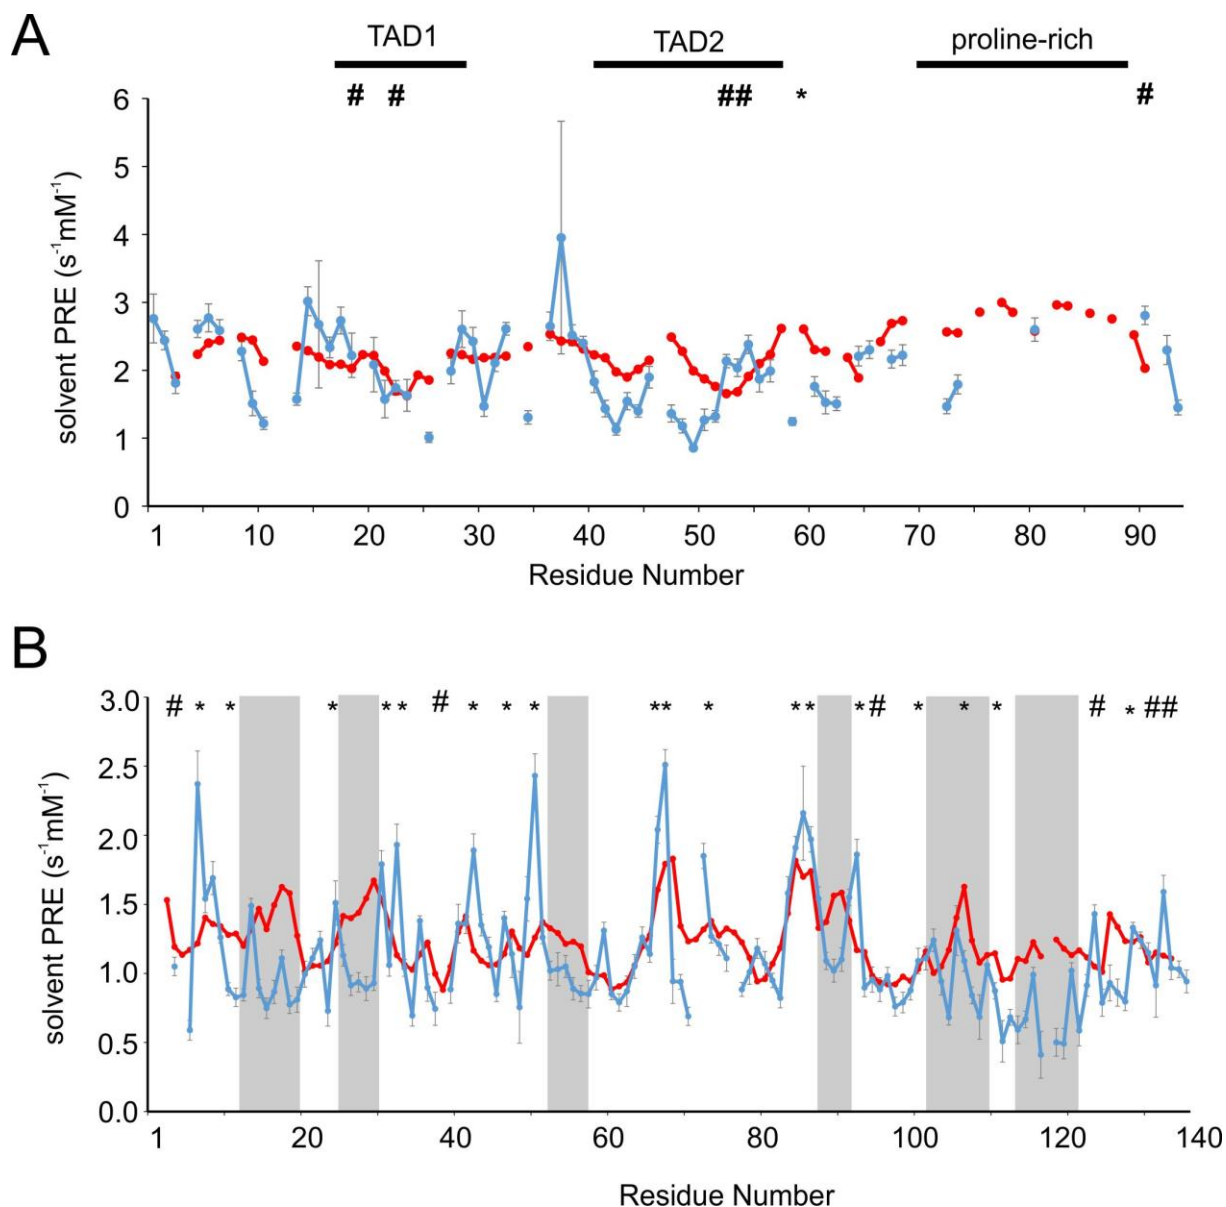

**Supporting Figure 4: Comparison of predicted and measured  $^1H^N$  solvent PREs of  $p53^{TAD}$  (A) and  $\alpha$ -synuclein (B).** Predicted (red) and experimentally determined (blue) sPRE values from  $^1H, ^{15}N$  HSQC read-out spectra are shown. Regions binding to co-factors (TAD1, TAD2) and the proline rich region are labeled ( $p53^{TAD}$ ). Regions of strong variations between predicted and measured sPRE values are highlighted by grey boxes and reproduce the shielding observed for the  $^1H^\alpha$  sPRE data ( $\alpha$ -synuclein). Experimental sPRE values are calculated by fitting the data with a linear regression equation. Predicted sPRE values are based on the previously described ensemble approach. Residues with bulky side chains (Phe, Trp, Tyr) are labeled with #, and exposed glycine residues are labeled with \* (see Supporting Figure 2 for bulkiness profiles). Errors of the measured  $^1H$ - $R_1$  rates were calculated using a Monte Carlo-type resampling strategy and are shown in the diagram as error bars.

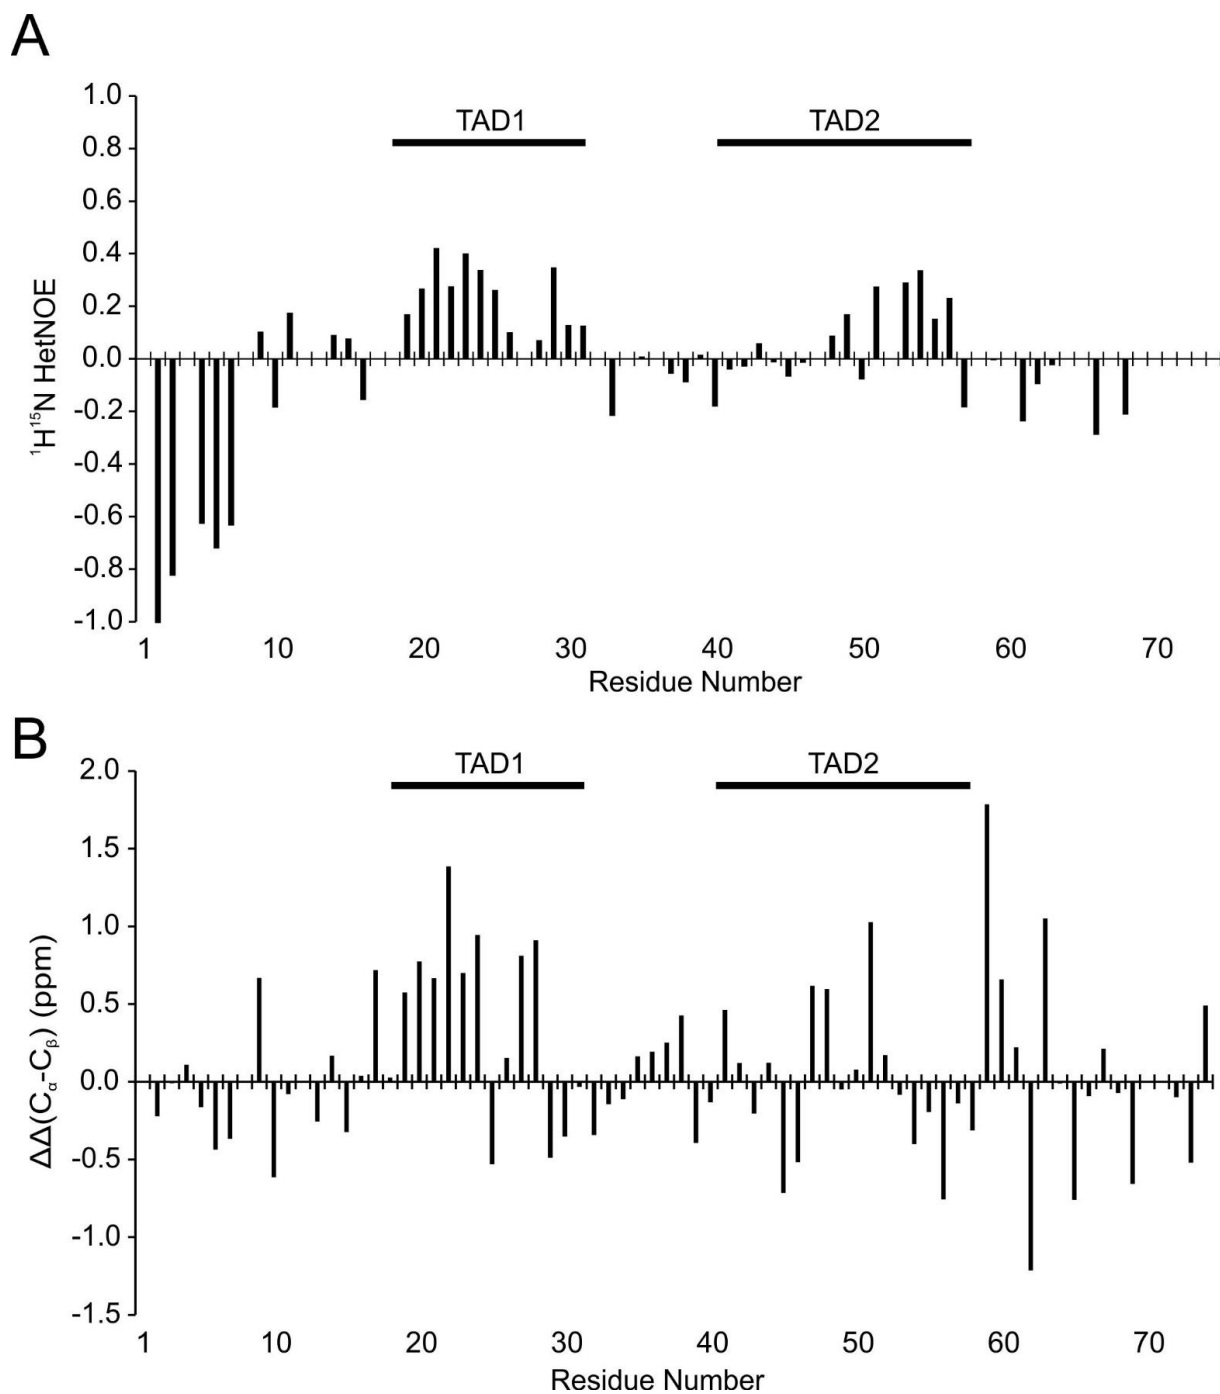

**Supporting Figure 5: p53<sup>TAD</sup> {<sup>1</sup>H}-<sup>15</sup>N heteronuclear NOE (A) and secondary chemical shifts (B).** {<sup>1</sup>H}-<sup>15</sup>N heteronuclear NOEs were recorded on an Avance Neo 600 MHz spectrometer using the same conditions as described in materials and methods. Secondary chemical shifts were calculated from <sup>13</sup>C<sup>α</sup> and <sup>13</sup>C<sup>β</sup> chemical shifts obtained from backbone resonance assignment.
